# Supplementary material
Source: PubMed Central journal article supplement (PMC6088160)
Supplement: JB.00288-18_zjb999094846s1.pdf [file JB.00288-18_zjb999094846s1.pdf]

**Methylotrophy in mycobacteria: Dissection of the methanol metabolism pathway in  
*Mycobacterium smegmatis***

Abhishek Anil Dubey, Saloni Rajesh Wani, Vikas Jain#

Microbiology and Molecular Biology Laboratory, Department of Biological Sciences, Indian  
Institute of Science Education and Research (IISER), Bhopal, India

Running head: Methanol metabolism in *Mycobacterium smegmatis*

#Address correspondence to Vikas Jain, vikas@iiserb.ac.in

**SUPPLEMENTARY MATERIAL**

**SUPPLEMENTARY FIGURES S1, S2, S3, and S4**

**SUPPLEMENTARY TABLE S1**

**Figure S1**

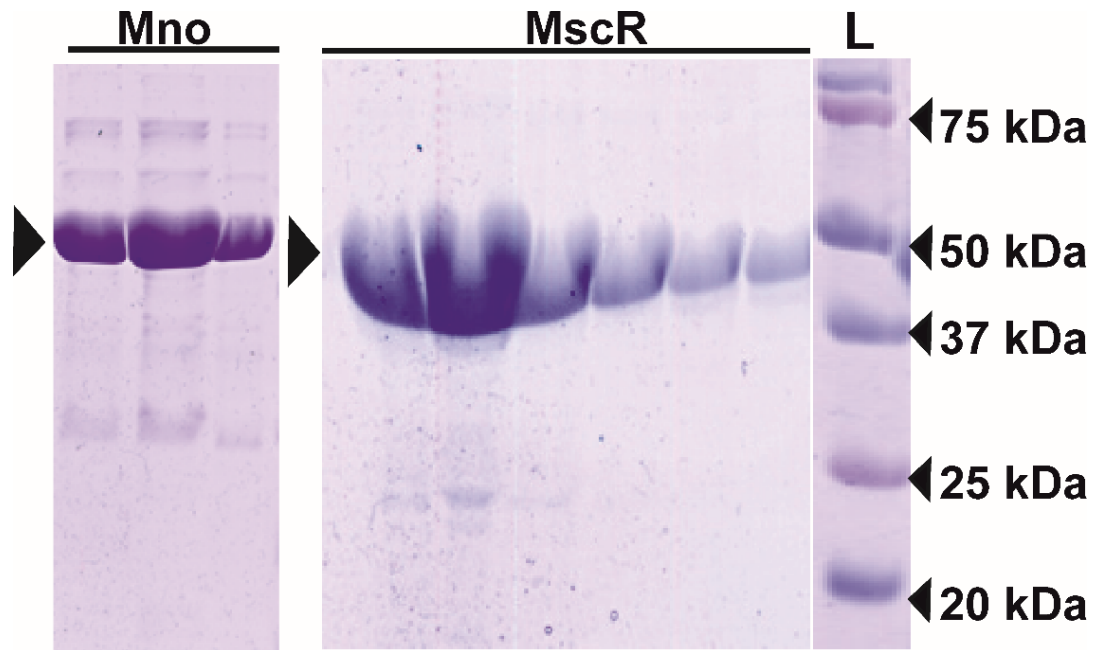

**Figure. S1: SDS-PAGE gel demonstrating the purity of Mno and MscR.**

Mno and MscR were purified on Ni-NTA affinity chromatography. The eluted proteins were loaded on an SDS-PAGE gel to assess the purity. Only the eluted proteins are shown; purified protein bands are marked with black triangle. Protein molecular weight ladder ('L') was used to compare the mobility of the both the proteins. A few of the ladder bands are marked with their molecular weights mentioned on the right.

Figure. S2

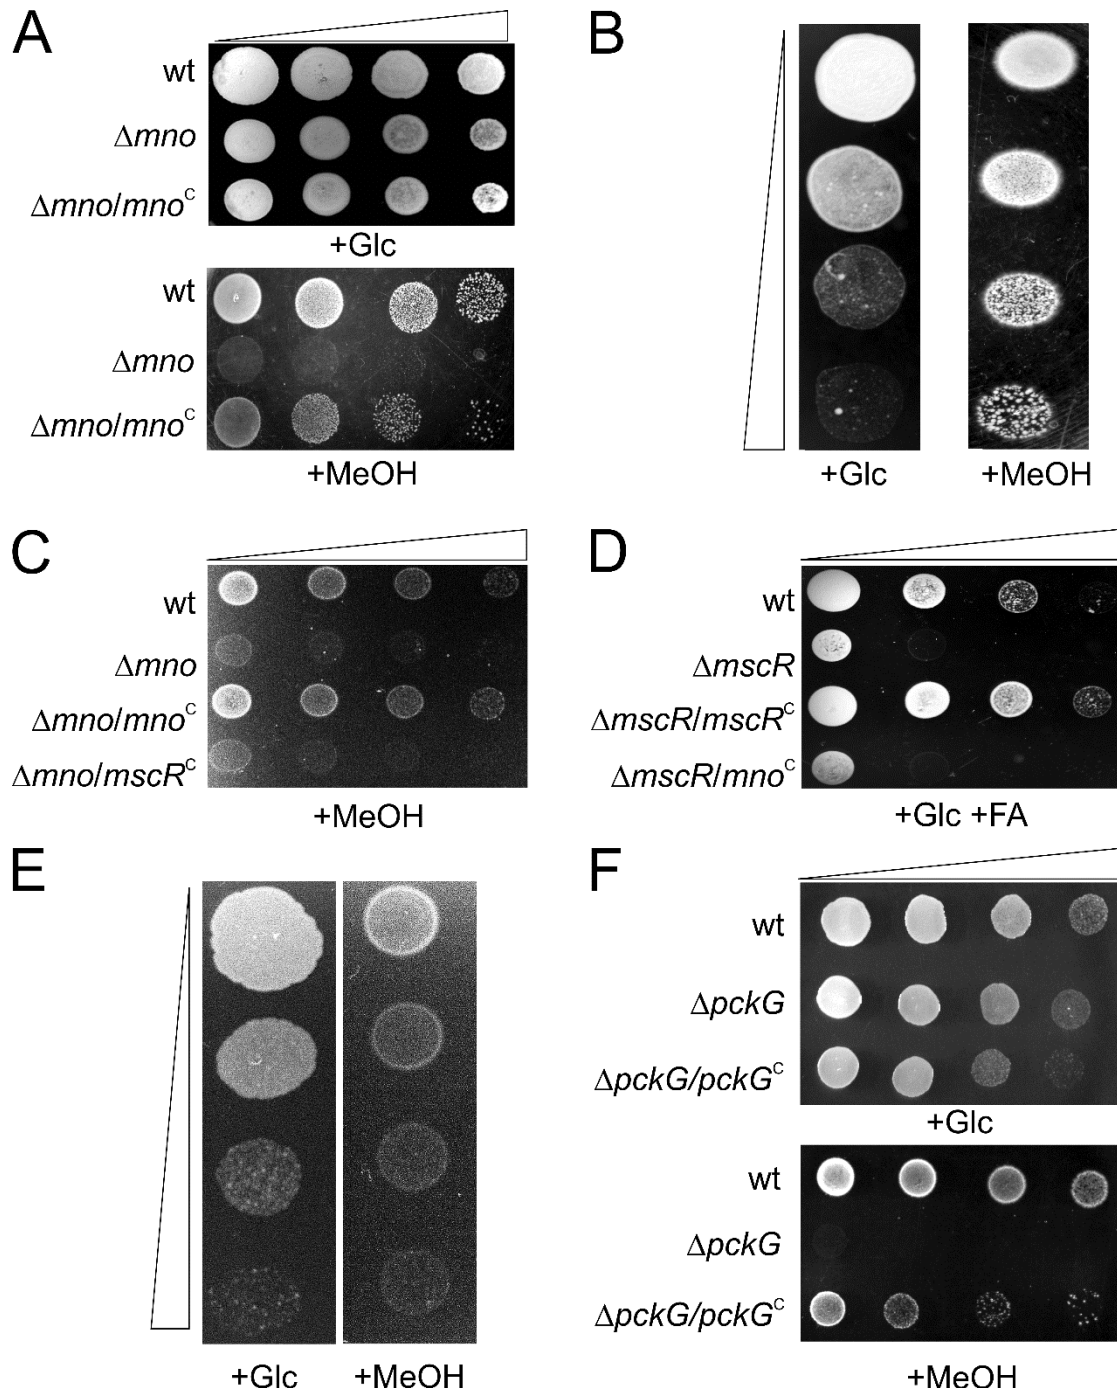

**Figure. S2: Spot assays of *Msm* wild-type and mutants on appropriate carbon sources.**

In addition to the growth curves, spot assays were performed for the wild-type and the mutants which are involved in the methylotrophic metabolism in *Msm*. The assays were performed on

either glucose (+Glc), methanol (+MeOH), or in the presence of both glucose and formaldehyde (+Glc +FA) as the carbon sources. (A) Physiological role of *mno* was confirmed by growing bacteria on either methanol or glucose. The top panel shows the bacterial growth in the presence of 2% glucose. While *M. smegmatis*  $\Delta mno$  is unable to utilize methanol as sole carbon source (bottom panel),  $\Delta mno$  complemented using pADhpMno shows growth on 2% methanol. Both wild-type *M. smegmatis* (wt) and  $\Delta mno$  carry pSS1 vector. (B) Spot assay was carried out with *Msm* $\Delta mscR$  on glucose and methanol as the sole carbon sources. Data show that *mscR* knockout can utilize methanol as the sole carbon source. (C) Spot assays were carried out to assess the complementation of the loss of Mno by MscR since the latter possesses methanol dehydrogenase activity in vitro. Panel shows that the wild-type *Msm* (wt) and the  $\Delta mno$  complemented with pADhpMno ( $\Delta mno/mno^C$ ) are able to grow on methanol, whereas *Msm* $\Delta mno$  and  $\Delta mno/mscR^C$  ( $\Delta mno$  complemented with pSWhpMscR) cannot. The data thus show that MscR cannot complement the loss of Mno in vivo. (D) Similarly, Mno which possesses formaldehyde dehydrogenase activity is unable to complement the loss of MscR in vivo, when the bacteria are grown in the presence of glucose and formaldehyde. Complementation could be successfully accomplished only by using pSWhpMscR in the  $\Delta mscR$  strain.  $\Delta mscR/mno^C$  denotes  $\Delta mscR$  complemented with pADhpMno. In both panels C and D, the wt and the knock out strains ( $\Delta mno$  and  $\Delta mscR$ ) were transformed with empty plasmid (pSS1). (E) Spot assay carried out with the *MSMEG\_3103* knockout shows that the cells are able to grow on methanol as the sole carbon source. (F) Spot assays were performed with  $\Delta pckG$  to decipher the role of Pck in methanol metabolism. In contrast to glucose (top panel),  $\Delta pckG$  does not show growth on methanol as the sole carbon source (bottom panel).  $\Delta pckG$  complemented with pADhpPck ( $\Delta pckG/pckG^C$ ) successfully restores growth on methanol. In each panel, the triangle represents the dilutions of

the spotted culture, which are  $10^{-1}$ ,  $10^{-2}$ ,  $10^{-3}$ , and  $10^{-4}$ , in that order. Experiments in each case were repeated at least three times; only one representative image is shown here in each panel.

**Figure. S3**

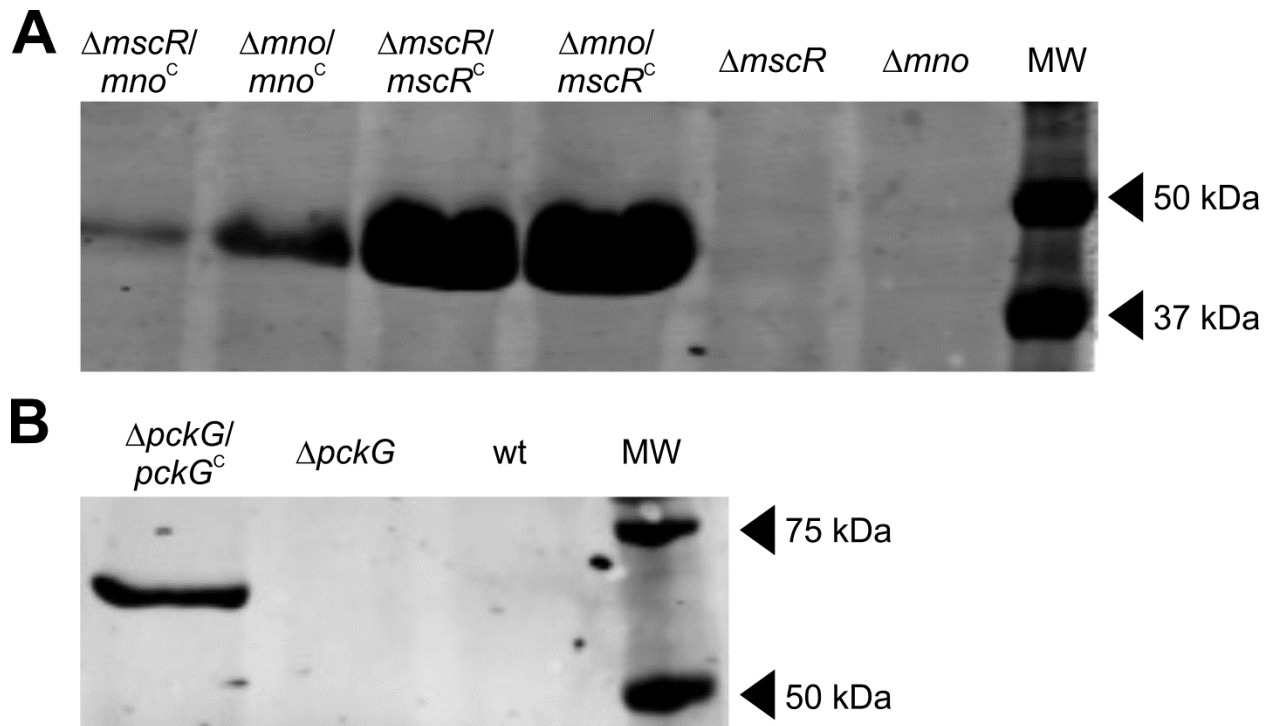

**Figure S3. Confirmation of the expression of recombinant proteins by Western blotting**

The expressed protein in each of the complemented strain (represented with superscript ‘C’) was confirmed by probing the blot with anti-His antibodies. Panel A shows the expression of Mno and MscR (first four lanes). The knockout cells that were transformed with empty vector do not show any expression. Panel B shows the expression of Pck; here, the wild-type (wt) and the knockout cells were transformed with empty vector and do not show any expression. In both the panels, MW represents the molecular weight marker with two bands marked.

Figure. S4

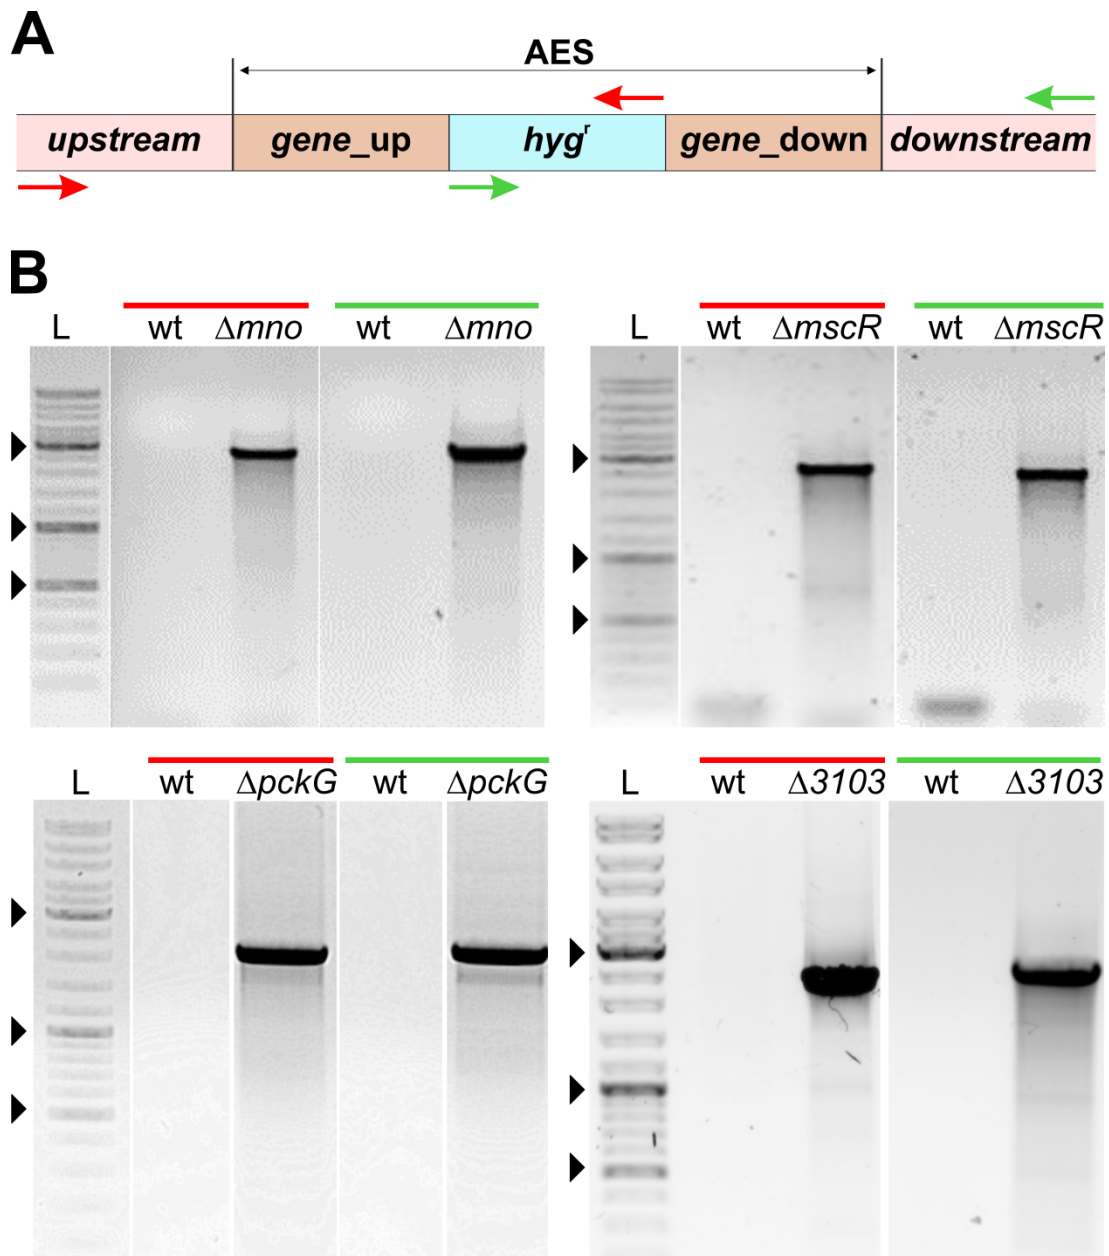

**Figure S4. Genetic knockout confirmation by PCR**

Panel A shows the strategy for the knockout confirmation by PCR using genomic DNA as template. One set of primers was designed specific for the hygromycin cassette (*hyg<sup>r</sup>*) and

another set at ~ 500 bp flanking regions of the allelic exchange substrate (AES; marked by arrow). Two such PCR reactions were performed – one amplifying the upstream region + *hyg<sup>r</sup>* (red) and the other amplifying the downstream region + *hyg<sup>r</sup>* (green). B) Ethidium bromide-stained agarose gel images showing the amplified DNA bands in the knockouts for four genes viz. *mno*, *mscR*, *pckG*, and *MSMEG\_3103* (*3103*) are shown; ‘wt’ represents the wild-type bacterium. Amplification between 2 – 3 kb (depending upon the knockout) is a confirmation of the knockout; ‘wt’ does not show this amplified band. Further, the amplified region was verified by sequencing. L indicates the DNA ladder with the three marked bands corresponding to 0.5, 1.0, and 3.0 kb in that order, in each panel. The horizontal bar colour (either red or green) matches with the set of primers used in panel A.



**Table S1:** List of oligos used in the present study. Sequence of each oligo in 5' to 3' is given. The purpose of each oligo in the present study is also mentioned for easy reference.

| Oligo       | Sequence (5'-3')                      | Purpose                                          |
|-------------|---------------------------------------|--------------------------------------------------|
| mnopMSFor   | ATGGCCATTGAGCTGAACCAGATTTGG           | Cloning of <i>mno</i> in pMS-QS-CHS and pSS1     |
| mnopMSRev   | GTAGGACTCGTTGATCGCGTGGTTC             |                                                  |
| mnoRTFor    | TCTGCTTGTGGTGGACTTG                   | Real Time PCR for <i>mno</i> expression          |
| mnoRTRev    | GTCGAACCCCAAGGACTACA                  |                                                  |
| mnoUpFor    | GCATGTCCGACGCAGCCCGCCACCGC            | Amplification <i>mno</i> upstream fragment       |
| mnoUpRev    | CGCCACGTACATCACCACCTGGTTCAGCTCAATGGCC |                                                  |
| mnoHygFor   | CATTGAGCTGAACCAGGTGGTGTACGTGGCG       | Amplification of <i>hyg<sup>r</sup></i> cassette |
| mnoHygRev   | GATCGCGTGGTTCACCGATCCGGGGGGCGTC       |                                                  |
| mnoDownFor  | CCTGACGCCCCCGGATCGGTGAACCACGCGATC     | Amplification <i>mno</i> downstream fragment     |
| mnoDownRev  | GAGGTCAACACCACCCACGGCACCG             |                                                  |
| mnoLongFor  | GCGTTGAACGTCGGCGCTGCCGGTGG            | PCR confirmation of $\Delta mno$                 |
| mnoLongRev  | GTGCGGGTTGAACCCCTTGTCGGCGTCC          |                                                  |
|             |                                       |                                                  |
| mscRpMSFor  | ATGCCTCAGACTGTGCGCGGTGTGATTTCTCG      | Cloning of <i>mscR</i> in pMS-QS-CHS and pSS1    |
| mscRpMSRev  | TCGGTCCAACACCACCGGAGCGCAGC            |                                                  |
| mscRRTFor   | CTGTGCGCGGTGTGATTTCTCG                | Real Time PCR for <i>mscR</i> expression         |
| mscRRTRev   | CAACAGGAACGGGAACTCGTCG                |                                                  |
| mscRUpFor   | CCAACCTCCTCAGGGTCCTGTTCGG             | Amplification <i>mscR</i> upstream fragment      |
| mscRUpRev   | CGTACATCACCACGCGCACAGTCTGAGGCATGG     |                                                  |
| mscRHygFor  | GACTGTGCGCGTGGTGTACGTGGCGAACTCC       | Amplification of <i>hyg<sup>r</sup></i> cassette |
| mscRHygRev  | CGGTCCAACACCAGATCCGGGGGGCGTCAGGC      |                                                  |
| mscRDownFor | CCCCGGATCTGGTGTGGACCGATGAGCG          | Amplification <i>mscR</i> downstream fragment    |
| mscRDownRev | GACCACGGTTTCGGCGGGCAGC                |                                                  |
| mscRLongFor | GCTGCACGGCCAGTTGCTCGTAGATGTTCTCG      | PCR confirmation of $\Delta mscR$                |
| mscRLongRev | CCACCTCTTCGGGCGTGCTGCTCTGC            |                                                  |
|             |                                       |                                                  |
| rpoBRTFor   | TCGATGTCACTGTCCTTCTCGGATC             | Real Time PCR for <i>rpoB</i> expression         |
| rpoBRTRev   | GACCGTCTGGCTCTTGATCTC                 |                                                  |

|             |                                      |                                                     |
|-------------|--------------------------------------|-----------------------------------------------------|
| fdhDRTFFor  | GGAGATCCGGGTCAACGGCACG               | Real Time PCR for <i>fdhD</i> expression            |
| fdhDRTRRev  | GTCCAGCACGTTGTAGGTGTTGACC            |                                                     |
| fdhFRTFFor  | GATTATGACGCCGATTACGACGATCACG         | Real Time PCR for <i>fdhF</i> expression            |
| fdhFRTRRev  | CGAAGCCGTGACGCTGGTTCAGG              |                                                     |
|             |                                      |                                                     |
| 3103RTFor   | CGACGATTGGACCGATCTCGACACG            | Real Time PCR for <i>MSMEG_3103</i> expression      |
| 3103RTRev   | GCTGGAACAGCGTGTACGCGAGC              |                                                     |
| 3103UpFor   | CTTCATGACCTTGTTCGATGTCGGCATCG        | Amplification <i>MSMEG_3103</i> upstream fragment   |
| 3103UpRev   | CGTACATCACCCTGATCTCTTCGGCCGTGGTTCACG |                                                     |
| 3130HygFor  | CCACGGCCGAAGAGATCAGTGGTGTACGTGGCG    | Amplification of <i>hyg<sup>r</sup></i> cassette    |
| 3103HygRev  | CGAGCGATCGCTCGATCCGGGGGGCGTCAGG      |                                                     |
| 3103DownFor | CCGGATCGAGCGATCGCTCGAGAACTGATCG      | Amplification <i>MSMEG_3103</i> downstream fragment |
| 3103DownRev | CTTGATCAGCAGGTTGGGCCGGTTCG           |                                                     |
| 3103LongFor | CGAGCACCAGCGTGGTGAGCACGG             | PCR confirmation of $\Delta$ <i>MSMEG_3103</i>      |
| 3103LongRev | GTCGAGGCCACAGCGGACGCTGCACG           |                                                     |
|             |                                      |                                                     |
| pckGpMSFor  | ATGACCTCAGCGACCATTCCGGGTTTGG         | Cloning of <i>pckG</i> in pMS-QS-CHS and pSS1       |
| pckGpMSRev  | GCCCTCTTCGGACAGGCGGTGCTTGAGC         |                                                     |
| pckGRTFFor  | CACCGCACCGACTAAACATCAGG              | Real Time PCR for <i>pckG</i> expression            |
| pckGRTRRev  | GGATTGAGCTTCTGGAAGGTGC               |                                                     |
| pckGUpFor   | GCTGGTCGGGTTGCTGCTGGCGGTGTGG         | Amplification <i>pckG</i> upstream fragment         |
| pckGUpRev   | GTACATCACCACAAACCCGGAATGGTCGCTGAGG   |                                                     |
| pckGHygFor  | CCATTCCGGGTTTGTGGTGTACGTGGCGAAC      | Amplification of <i>hyg<sup>r</sup></i> cassette    |
| pckGHygRev  | CCCTCTTCGGACAGGGATCCGGGGGGCGTCAGG    |                                                     |
| pckGDownFor | GACGCCCCCGGATCCCTGTCCGAAGAGGGCTAAC   | Amplification <i>pckG</i> downstream fragment       |
| pckGDownRev | CCAGTGCTCGCTCCGCCGAGGTGACG           |                                                     |
| pckGLongFor | CGTCGGCTTCGGACTCGGGGTCGCGCTGG        | PCR confirmation of $\Delta$ <i>pckG</i>            |
| pckGLongRev | CTCTTCCCACCCCATGTCGAGCATG            |                                                     |
